# Supplementary material for: Energy-saving Optimized Parameters for 3D Selective Laser Melting using Dimensionless Model and Machine Learning
Source: Research Square preprint supplement (doi:10.21203/rs.3.rs-7127180/v1), 2025-11-28
Supplement: Supplementary file 1 [file c603bed3bc2d077510fb4b85.docx]

- In the SLM process of Ti6Al4V, a combination of dimensionless modeling, melt pool geometry analysis, and energy consumption index was used to identify the optimal laser power and scanning speed.
- An artificial neural network (ANN) was employed to predict melt pool aspect ratio and energy-saving index (Es), achieving 98.8% accuracy for defining the optimal processing zone.
- Experimental validation showed that the optimal parameter set (Set I: 300 W, 1400 mm/s, h = 80 µm) resulted in a relative density of 99.977%, tensile strength of 1201 MPa, and elongation of 8.2%.
- Through a novel method, the maximum hatching space (h = 120 µm) was determined, reducing the energy-saving index by approximately 33.4% while maintaining high density (99.948%) and excellent mechanical properties.
- This optimization strategy effectively balances build quality and energy efficiency, enhancing SLM process performance and offering potential for application to other metals and multi-objective optimizations.
